1 Multiplicative Joint Coding in Preparatory Activity for Reaching  
2 Sequence in Macaque Motor Cortex

3

4

5 Running Title: Gain modulation for double reach in motor cortex

6

7

8 Tianwei Wang<sup>1,3,4</sup>, Yun Chen<sup>1,3</sup>, Yiheng Zhang<sup>1,3</sup>, and He Cui<sup>1,2,3,4\*</sup>

9

10

11 <sup>1</sup>Center for Excellence in Brain Science and Intelligent Technology, Institute of Neuroscience,

12 Chinese Academy of Sciences, Shanghai 200031, China

13 <sup>2</sup>Shanghai Center for Brain and Brain-inspired Intelligence Technology, Shanghai, 200031,

14 China

15 <sup>3</sup>University of Chinese Academy of Sciences, Beijing 100049, China

16 <sup>4</sup>Chinese Institute for Brain Research, Beijing 102206, China

17

18

19 \*Correspondence: [hecui@cibr.ac.cn](mailto:hecui@cibr.ac.cn)

20

21

22

23 **Abstract**

24 Although motor cortex has been found to be modulated by sensory or cognitive sequences, the  
25 linkage between multiple movement elements and sequence-related responses is not yet understood.  
26 Here, we recorded neuronal activity from the motor cortex with implanted micro-electrode arrays  
27 and single electrodes while monkeys performed a double-reach task that was instructed by  
28 simultaneously presented memorized cues. We found that there existed a substantial multiplicative  
29 component jointly tuned to impending and subsequent reaches during preparation, then the coding  
30 mechanism transferred to an additive manner during execution. Multiplicative joint coding, which  
31 also spontaneously emerged in a recurrent neural network trained for double-reach, enriches neural  
32 patterns for sequential movement, and might explain the linear readout of elemental movements.

33  
34

## 35 Introduction

36 Motor cortex has long been thought to be central in planning and generating movement. A large  
37 body of evidence demonstrates a correlation between neuronal activity in motor cortex and a variety  
38 of motor variables, such as direction, speed, distance, and trajectory<sup>1-7</sup>. Beyond the single ballistic  
39 movements examined in these studies, multi-step movements, such as sequencing and ordering  
40 action, are crucial in daily behavior<sup>8,9</sup>. As one of the brain areas conveying highly accurate  
41 information about movement timing<sup>10</sup> and kinematics<sup>11</sup>, motor cortex seems to be involved in  
42 causal sequencing of multi-step movements<sup>12</sup>. Sequential information has been reported to be  
43 encoded in the population response before movement initiation<sup>13-15</sup>. In addition, most neurons are  
44 reported to show activity related to both target location and serial order<sup>16,17</sup>. However, most of these  
45 studies instructed the sequence of movement with serial sensory stimuli, which might result in neural  
46 activity that differs from internally generated motor sequences<sup>18-20</sup>. In tasks carried out in the  
47 absence of serial sensory inputs, neuronal activity related to sequential contexts emerges during  
48 preparation, and becomes prominent during execution<sup>21,22</sup>. Furthermore, despite differences at the  
49 single-neuron level, the neural population preserves a reliable readout of movement direction. That  
50 is to say, both individual movement elements and sequential information are simultaneously and  
51 robustly encoded in the motor cortex<sup>21</sup>.

52 In principle, a continuous action sequence consists of elements spatio-temporally coordinated in a  
53 complex manner, rather than a series of independent actions<sup>23-25</sup>. However, the ‘competitive  
54 queuing’ hypothesis suggests that the brain produces sequential movement via a combination of  
55 parallel representations of specific actions<sup>26</sup>. A recent study on double-reach supports this parallel-  
56 representation hypothesis, suggesting that motor cortex does not fuse two reaches, but recruits two  
57 independent motor processes sequentially<sup>27</sup>. The resulting concurrence of motor execution and  
58 motor planning, however, is insufficient for rejecting the possibility of interaction between  
59 movement elements beforehand. It remains unclear if sequential movement is parallel or jointly  
60 coded in the preparation period.

61 To further explore the motor preparation and encoding characteristics of sequential movements in  
62 a strict behavioral and neurophysiological context, we recorded neuronal activity from the motor  
63 cortex via implanted arrays or single electrodes while monkeys were performing a double-reach that  
64 was instructed by simultaneously presented cues that had to be memorized. We found that neuronal  
65 activity could be regressed as a multiplication of directional tunings to reaching elements in the  
66 preparatory period, and then converted to parallel coding for both movement elements after  
67 movement onset, indicating the existence of a gain-like interaction in planning the motor sequence.  
68 Neural population dynamics derived from our array-recorded data indicates that a nonlinear  
69 interaction is embodied in the spatial structure of initial states. In computational simulations,  
70 multiplicative coding for motor sequences spontaneously emerges in a recurrent dynamical network,  
71 and benefits reliable linear readouts of movement elements. These results suggest that the motor  
72 cortex is profoundly involved in concatenating multiple movement elements into a sequence, and  
73 that a gain-like multiplication is a key signature of complex serial behavior.

74

## 75 **Results**

### 76 **Behavioral task**

77 Three rhesus monkeys (*Macaca mulatta*, male 5-10 kg) performed the memory-guided double-  
78 reach task (Fig. 1a). A trial began with a green dot displayed on the center of a touch screen, and the  
79 monkey was required to touch it. After 300 ms, in 1/3 of the trials (single-reach, SR), another green  
80 dot was presented as a reaching goal for 400 ms (cue period) at one of the six corners of a regular  
81 hexagon (i.e., at directions of 0°, 60°, 120°, 180°, 240°, or 300°). After the peripheral cue was  
82 extinguished, there was a memory period of 400-800 ms. The monkey was trained to keep its hand  
83 on the central green dot until it was turned off (GO signal), and then reach to the previously cued  
84 location to obtain a reward. In the remaining trials (double-reach, DR), a green square and a green  
85 triangle were presented simultaneously during the cue period. The square was in the same alternative  
86 directions as the SR surrounding targets. The triangle was displaced from the square by 120°  
87 clockwise (CW, 1/3 of trials) or 120° counterclockwise (CCW, 1/3 of trials). After the memory  
88 period without peripheral cues, the monkey was required first to reach to the memorized square  
89 location, and then to immediately reach to the memorized triangle location. The monkey was  
90 rewarded only if it reached the specified target within a margin of three centimeters, and in the  
91 correct order. For a correct trial, the green square would reappear after the 1st reach, and the triangle  
92 would appear in purple after the 2nd reach. All 18 conditions (three trial types × six directions) were  
93 pseudo-randomly interleaved. Only correct trials were included in the analysis. Event markers are  
94 denoted as the GO signal (GO), the 1st/only movement onset (MO), the 1st/only movement end  
95 (ME), and the 2nd movement onset (MO2).

96 Hand trajectories exhibited a stereotype movement pattern in each condition for well-trained  
97 monkeys. All 1st reaches started from the center and moved towards the corresponding target in each  
98 condition (Fig. 1b). Muscular activities remained constant during the preparatory period across  
99 different conditions, excluding the possibility that the monkeys might develop different premature  
100 movements (e.g., adjust arm orientation) after cue for different conditions. The Pearson correlation  
101 coefficient of speed profiles until ME between DR and SR was  $0.99 \pm 0.006$  (mean  $\pm$  sd), and of  
102 surface electromyography (sEMG) of extensor digitorum communis (EDC) was  $0.99 \pm 0.005$   
103 (mean  $\pm$  sd) for monkey C (Fig. 1c). In addition, the dwell time on the 1st target was  $194 \pm 75$  ms  
104 (mean  $\pm$  sd) for monkey C,  $350 \pm 110$  ms (mean  $\pm$  sd) for monkey G, and  $150 \pm 47$  ms (mean  $\pm$  sd) for  
105 monkey B. The median duration of DR was  $586 \pm 95$  ms (mean  $\pm$  sd) for monkey C,  $818 \pm 131$  ms  
106 (mean  $\pm$  sd) for monkey G, and  $481 \pm 72$  ms (mean  $\pm$  sd) for monkey B, averaged across conditions.  
107 These results verified the expected transitory dwell on the 1st target in this task, and indicated  
108 behavioral consistency between SR and the 1st reach of DR in the same direction, in terms of hand  
109 trajectory, speed profile, and sEMG.

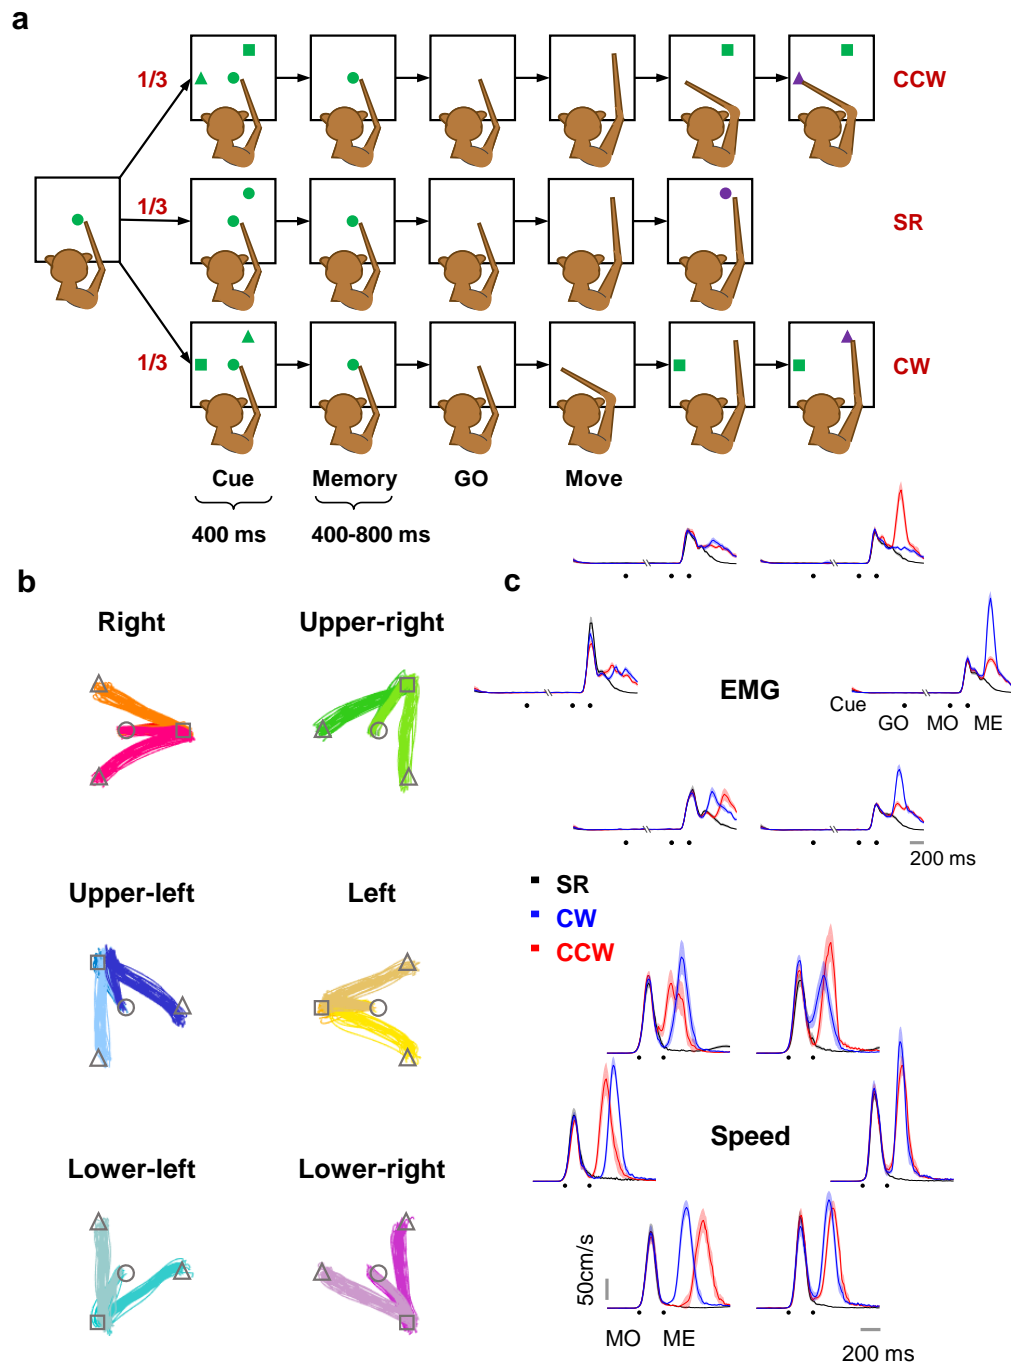

110

111

**Figure 1 Paradigm and behavior.**

112

113

114

115

116

117

118

119

120

a. Three types of trials were pseudo-randomly interleaved in each session. In single-reach (SR) trials, monkeys had to perform memory-guided center-out reach. In double-reach (DR) trials, two targets (a square and a triangle) were presented simultaneously in cue period, and then extinguished; the monkeys were required to hold the central target for a 400-800 ms memory period until it was turned off (GO signal). Next, monkeys finished reaching both targets in the sequence of the square to the triangle within 700-1200 ms. The triangles were located 120° from the squares in CW or CCW directions.

b. Hand trajectories in different conditions are grouped by their 1st/only reach direction from monkey C. Some trajectories are overlapped due to high similarity. No significant difference was found before the end of 1st/only reach (one-way ANOVA,  $p > 0.05$ ).

121 c. Surface electromyography (sEMG) and speed in one typical session. The Pearson correlation coefficient of  
122 the speed profile until 1st movement end between double reach and single reach was  $0.99\pm 0.006$  (mean $\pm$ sd) and of  
123 sEMG of extensor digitorum communis (EDC) was  $0.99\pm 0.005$  (mean $\pm$ sd) for monkey C.

124

## 125 **Heterogeneity in neuronal activity indicated mixed selectivity**

126 All electrophysiological recording sites were in the hemisphere contralateral to the hand used  
127 during the task. Only one hand was used by monkeys B and G, but for monkey C data were recorded  
128 first with single electrodes, and then arrays in the other hemisphere with a switch of hands. We  
129 collected 322 well-isolated task-related neurons from single-electrode recordings (224 from monkey  
130 B, 98 from monkey C left hemisphere) and 202 units sorted from array recordings (44 from monkey  
131 G, 158 from monkey C right hemisphere) in motor cortex (Fig. S1). Among these, we found  
132 considerable heterogeneity in firing patterns. Figure 2 illustrates four representative cells. The  
133 neuron in Fig. 2a exhibited a two-peak firing pattern in DR, each peak after a movement onset, while  
134 it had only one burst in SR. Notably, the direction with the highest firing rate changed remarkably in  
135 sequential movements. The neuron in Fig. 2b fired with a constant PD towards the lower left.  
136 Surprisingly, even though its directional selectivity was remarkably similar for both SR and DR, the  
137 firing rate was significantly higher in DR (according to the 95% confidential interval plotted in  
138 shade), indicating that it conveyed information regarding target-movement number. Also, the  
139 preparatory activity would diverge with the 2nd reach before GO and MO in neurons, as in Fig. 2c  
140 and 2d.

141 We further examined the proportion of neurons with sequence selectivity in three periods:  
142 preparatory (600 ms before GO), pre-movement (200 ms before MO), and peri-movement period  
143 (200 ms before ME). Among the 322 neurons recorded by single-electrodes, 52% exhibited  
144 significantly different firing rates for SR and DR in the preparatory period (Wilcoxon rank sum test,  
145  $p<0.05$ ). This proportion increased to 68% in the pre-movement period, and then to 84% in the peri-  
146 movement period (Wilcoxon rank sum test,  $p<0.05$ ). As for the comparison between CW and CCW  
147 trials, 30%, 48%, and 72% of neurons showed significant differences during the preparatory, pre-  
148 movement, and peri-movement periods, respectively (Wilcoxon rank sum test,  $p<0.05$ ). For the 202  
149 array-recorded neurons, 80%, 89%, and 97% were significantly tuned to sequence during  
150 preparatory, pre-movement, and peri-movement periods, respectively (Wilcoxon rank sum test,  
151  $p<0.05$ ). In comparing CW and CCW trials, the proportions were 48%, 68%, and 87% during the  
152 preparatory, pre-movement, and peri-movement periods, respectively (Wilcoxon rank sum test,  
153  $p<0.05$ ). These considerable proportions reveal a substantial sequence-selectivity in the motor  
154 cortex.

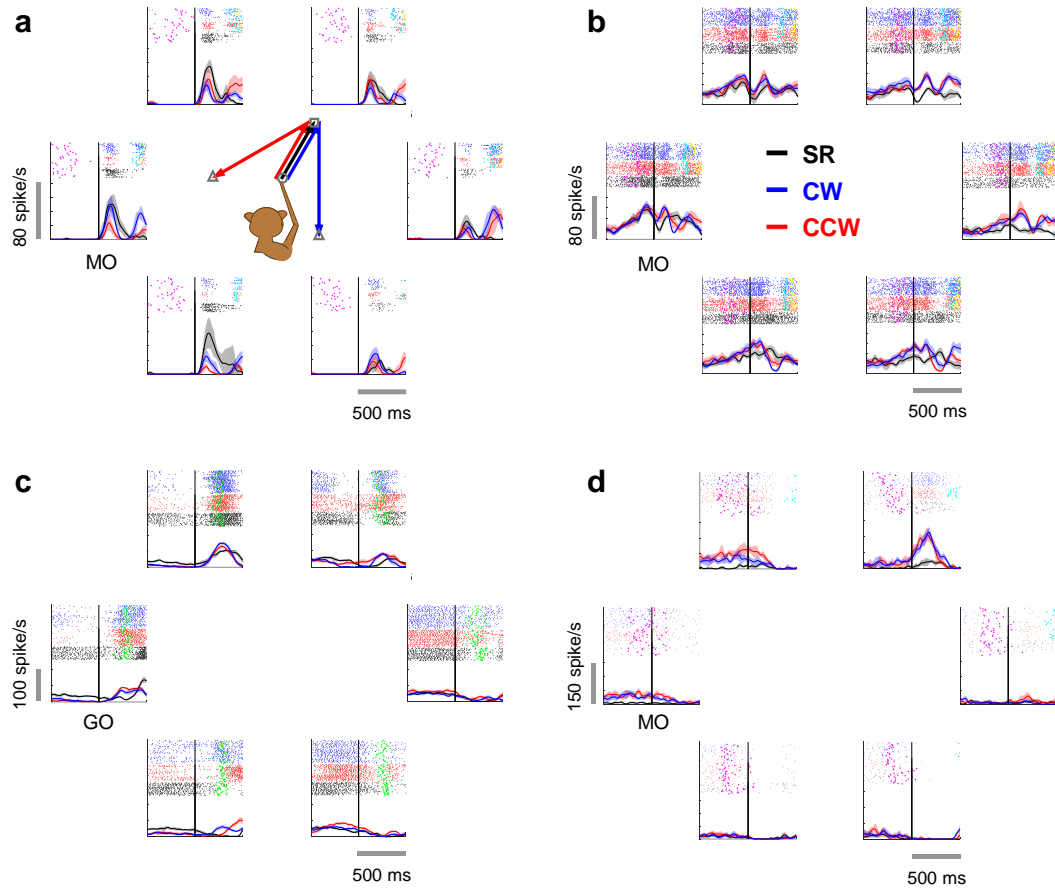

155

156 **Figure 2 Examples of cells in motor cortex showing heterogeneous firing patterns.**

157 In each panel (a-d), the six subplots show PSTHs of the same neuron in three conditions with 1st reach toward the  
 158 corresponding location (e.g., the upper-right subplot denotes the 1st reach to 60°). Rasters are plotted at the top of  
 159 each PSTH (20-ms SD Gaussian kernel). Spike trains in SR (black line), CW (blue line), and CCW (red line) trials  
 160 are aligned to the 1st/only movement onset (MO) in a, b, d, but aligned to GO-cue in c. Time of GO (magenta dots),  
 161 MO (green dots), the 2nd movement onset (MO2, cyan dots), and the 2nd movement end (yellow dots) are presented  
 162 in the rasters.

163

164 **Additive vs. multiplicative joint coding**

165 The above results show single-neuron responses related to reaching sequences. However, whether  
 166 such sequence-related response results from joint coding or parallel coding is the next question.  
 167 Then, based on the directional tuning function:

168 
$$FR = a \cos(\theta - \theta_{PD}) + c \quad (1)$$

169 where  $\theta$  is the movement direction,  $\theta_{PD}$  is the PD,  $a$  and  $c$  denote regression coefficients; we  
 170 developed two fitting models.

171 For parallel coding, the sequence-related difference comes from the overlap of two independent  
172 tuning components. For this kind of model, sequential modulation is a parallel process resulting from  
173 the preparation of the 2nd movement while the 1st movement still is in flight, as pointed out by  
174 Ames et al.<sup>28</sup>. Here, we focused on directional tuning alone, and defined an ‘additive model’ as  
175 follows:

$$176 \quad FR = a_1 \cos(\theta_1 - \theta_{PD}) + a_2 \cos(\theta_{21} - \theta_{PD}) + c \quad (2)$$

177 where  $FR$  is neuronal firing rate,  $\theta_1$  is the movement direction of the 1st reach,  $\theta_{21}$  is the 2nd  
178 movement direction starting from the 1st reaching endpoint, that is, in execution coordinates, since  
179 the regression result (Fig. S2) indicates that the 2nd reach is predominately conveyed in execution  
180 coordinates (movement direction) rather than visual coordinates (target location).  $\theta_{PD}$  represents the  
181 PD,  $a_1$  and  $a_2$  are coefficients, and  $c$  is the baseline firing rate. For simplicity, we assumed the PD to  
182 be consistent for both terms at the same time.

183 However, since the visual targets in our task were presented simultaneously, rather than  
184 sequentially as in many previous studies<sup>9, 15, 16, 28</sup>, the monkeys were more likely to prepare the  
185 entire reaching sequence beforehand<sup>24, 29</sup>. In this case, the different responses in DR might not  
186 simply result from the overlap of the ‘preparation-execution’, but from interaction between the  
187 tuning components corresponding to two reaches. Therefore, this raises the possibility of joint  
188 coding, for which an interactive term is essential. For computational convenience, and as inspired by  
189 a previous study suggesting that hand speed may act as a ‘gain field’ to the directional cosine tuning  
190 function<sup>30</sup>, we propose a ‘multiplicative model’ to depict the potential nonlinear gain-modulation  
191 between both elemental movements:

$$192 \quad FR = a_1 \cos(\theta_1 - \theta_{PD}) + b \cos(\theta_{21} - \theta_{PD}) \cos(\theta_1 - \theta_{PD}) + c \quad (3)$$

193 where  $b$  is a coefficient and other notations as in Eq. 2. If we set  $\Delta\theta = (\theta_{21} - \theta_1)/2$ , then the  
194 multiplicative term in Eq.3 can be transformed into a summation form that includes a doubled  
195 frequency (Eq. 4).

$$196 \quad b \cos(\theta_1 - \theta_{PD}) \cos(\theta_{21} - \theta_{PD}) = \frac{b}{2} \cos\left(2\left(\theta_1 - \theta_{PD} + \frac{\Delta\theta}{2}\right)\right) + \frac{b}{2} \cos\Delta\theta \quad (4)$$

197 To further examine the interaction between element movements and to avoid overfitting in the  
198 regression analysis, in addition to the standard version of the paradigm described in Results (Fig.  
199 1a), we trained monkey C to perform an extended version of the task with multi-direction, in which  
200 the angle between the square and triangle could be 60° or 120° in both CW and CCW directions as  
201 well as 180°. This multi-direction task has 36 conditions in total (six SR and 30 DR).

202 We tested these two possibilities on condition-averaged normalized firing rates with a 200-ms  
203 sliding window<sup>31</sup>. The fitting results of an example neuron are shown in Fig. 3, in comparison with  
204 its actual PSTHs. This neuron obviously had a sequence-related mixed selectivity, because its peri-  
205 movement activity varied with different subsequent movements, and the preparatory activity was  
206 also condition-dependent, though with small variation. The response reconstructed by the additive  
207 model (Eq. 2) reproduced the peri-movement firing pattern, but it did not capture the sequence-  
208 specific modulation during preparation. In contrast, the multiplicative model (Eq. 3) better captured



209 neural activity during the preparatory period, while losing that during the peri-movement period. In  
 210 Fig. 4, we plotted directional tuning curves of the same example cell with its actual firing rates (Fig.  
 211 4, left panel), along with reconstructed firing rates by additive (Fig. 4, middle panel) or  
 212 multiplicative (Fig. 4, right panel) models. The real firing rate for plotting and fitting was normalized  
 213 and averaged around MO (-100~100 ms to MO, peri-MO) and around ME (100~300 ms to MO,  
 214 peri-ME), respectively. For peri-MO (Fig. 4a), the neural tuning curves consist mostly of two peaks  
 215 and were only replicated by the tuning curves of the multiplicative model. This was not accidental,  
 216 because frequency doubling is a corollary of the product of two trigonometric functions (Eq. 4). For  
 217 peri-ME (Fig. 4b), PD shifted with conditions in data, and only the additive model yielded a similar  
 218 outcome. These results suggest that different coding rules cause distinctly different firing patterns.  
 219 The multiplicative interaction contributes to the period changing, whereas the additive relation can  
 220 easily lead to PD shifts while retaining the periodic identity. Comparing two epochs, the two coding  
 221 possibilities could co-exist and might alternate.

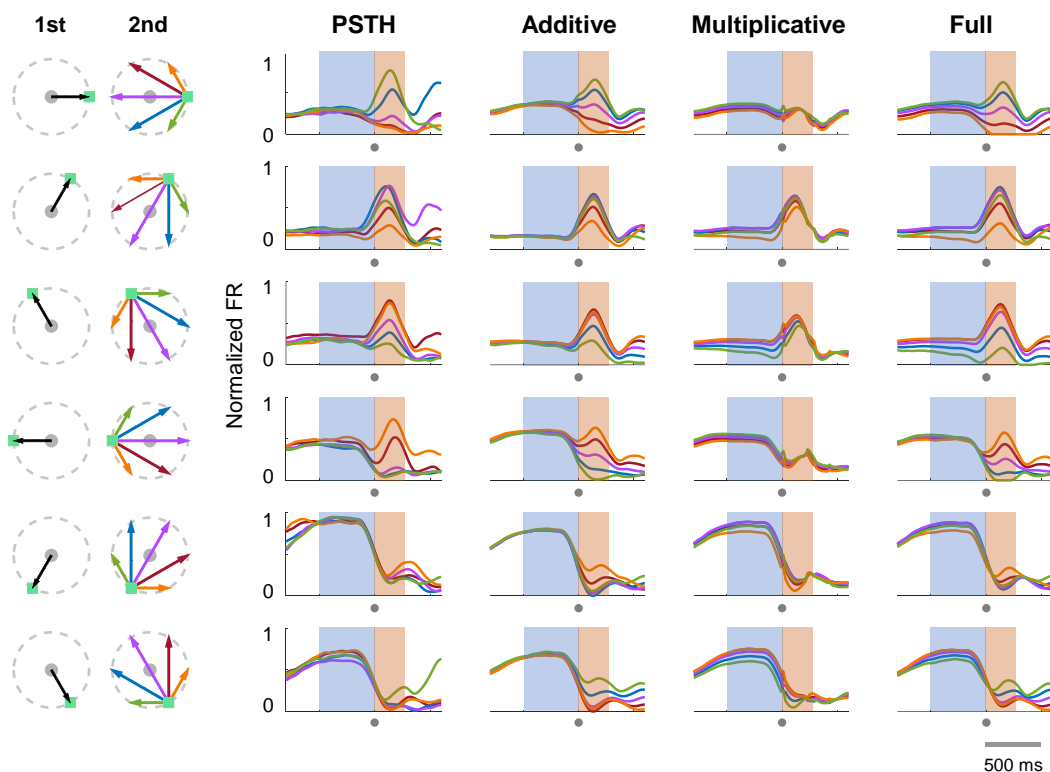

222  
 223 **Figure 3 Model fitting of an example neuron.**

224 Each row shows conditions with the same 1st reach (black arrow); the 2nd reach is plotted in different colors (CW  
 225 60° in green, CW 120° in blue, 180° in purple, CCW 120° in red, CCW 60° in orange; here angle is according to the  
 226 target locations in cue period). Four columns left to right are: Normalized data PSTHs; normalized firing rate  
 227 reconstructed by the additive model, the multiplicative model, and the full model, respectively. All activity is  
 228 aligned to MO (marked by the gray dots under timeline, time window is -800 ~ 600 ms to MO).

229 To further investigate the temporal dynamics of joint-coding rules, we proposed a ‘full model’ to  
 230 combine the two modulation forms:

$$231 \quad FR = a_1 \cos(\theta_1 - \theta_{PD}) + a_2 \cos(\theta_{21} - \theta_{PD}) + b \cos(\theta_{21} - \theta_{PD}) \cos(\theta_1 - \theta_{PD}) + c \quad (5)$$

232 where descriptions of notations are the same as in Eq. 2 and Eq. 3, defining  $a_1$  as the 1st reach  
 233 weight,  $a_2$  as the additive weight, and  $b$  as the multiplicative weight. The fluctuation of the  
 234 regression coefficients ( $a_1$ ,  $a_2$ , and  $b$ ) reflects the time-varying contribution of the corresponding  
 235 terms, thus enabling the full model to profile the transition of coded objects.

236

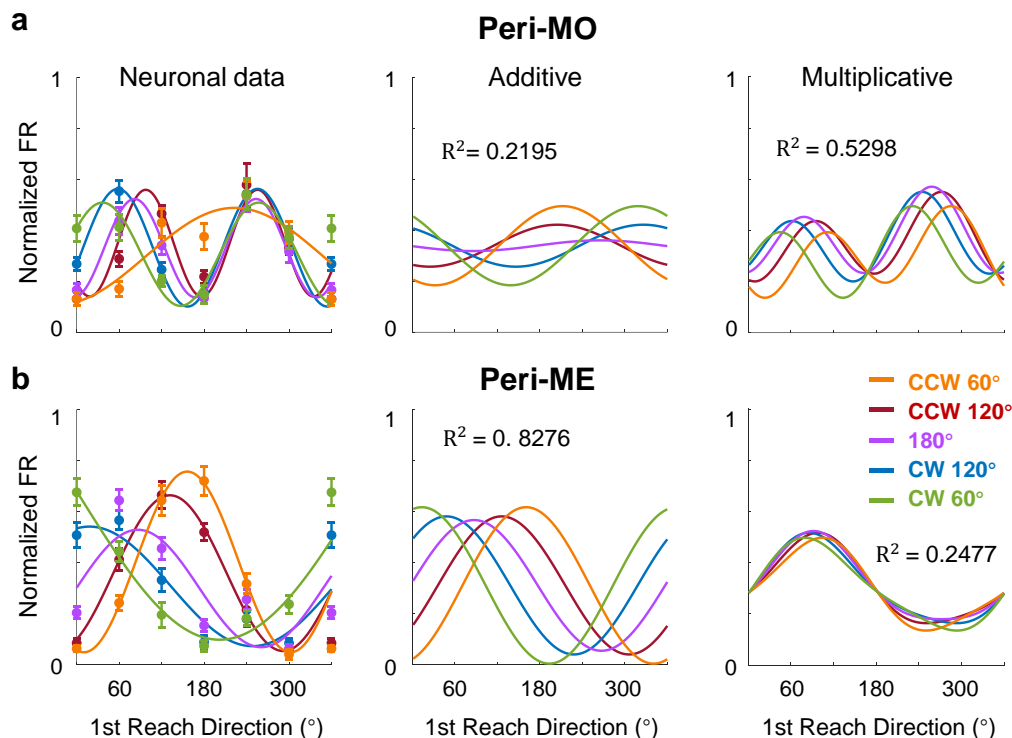

237 **Figure 4 Joint tunings of the example neuron around movement onset and end.**  
 238 **a.** Directional tuning curves of the example cell in Fig. 3 were plotted around MO (-100~100 ms to MO, peri-MO).  
 239 Left: Normalized firing rate in DR were trial-averaged and plotted in corresponding condition colors. Tuning curves  
 240 were fitted by Fourier expansion separately. Middle: Tuning curves of firing rates reconstructed by the additive  
 241 model. Right: Tuning curves of firing rates reconstructed by the multiplicative model.  $R^2$  showed the goodness-of-fit  
 242 of the model tuning curve. **b.** Similar with **a**, directional tuning curves around ME (100~300ms to MO, peri-ME).  
 243

244 We compared the goodness-of-fit of the full model with that of the additive model, the  
 245 multiplicative model, and a single cosine model (Eq.1, 1st reach direction), by the standard of the  
 246 population-averaged adjusted  $R^2$  (For the statistical method to compensate for the difference in  
 247 numbers of parameters between the full model and other models, see Methods) for M1 and PMd,  
 248 respectively (Fig. 5, array data from monkey C). The full model performed best in both areas; it was  
 249 also able to describe the tuning property of the example neuron throughout the whole trial (Fig. 3,  
 250 Full). Remarkably, the overall trend and preference for the multiplicative or additive model varied  
 251 by brain areas. For M1 neurons ( $n=118$ ), the goodness-of-fit for all models gradually increased  
 252 during preparation, and the multiplicative model was significantly better than the additive model at  
 253 MO (two-tailed Wilcoxon signed rank test,  $p=1.2e-05$ ). Nevertheless, the additive model performed  
 254 better after MO. Similar results were found in M1 data in all monkeys (Fig. S3, single-electrode  
 255 recording from monkeys B and C, and array data from monkey G). The effect size  $r$  (see Methods)  
 256 also indicates there is a small to medium effect for multiplicative model during preparatory period

257 for each monkey (Fig. S4). For PMd neurons (n=40), the adjusted  $R^2$  remained stable during  
 258 preparation. No significant difference was found between two models before MO (two-tailed  
 259 Wilcoxon signed rank test,  $p=0.06$ ). It seems that the transition from multiplicative to additive  
 260 coding was different in M1 and PMd.

261

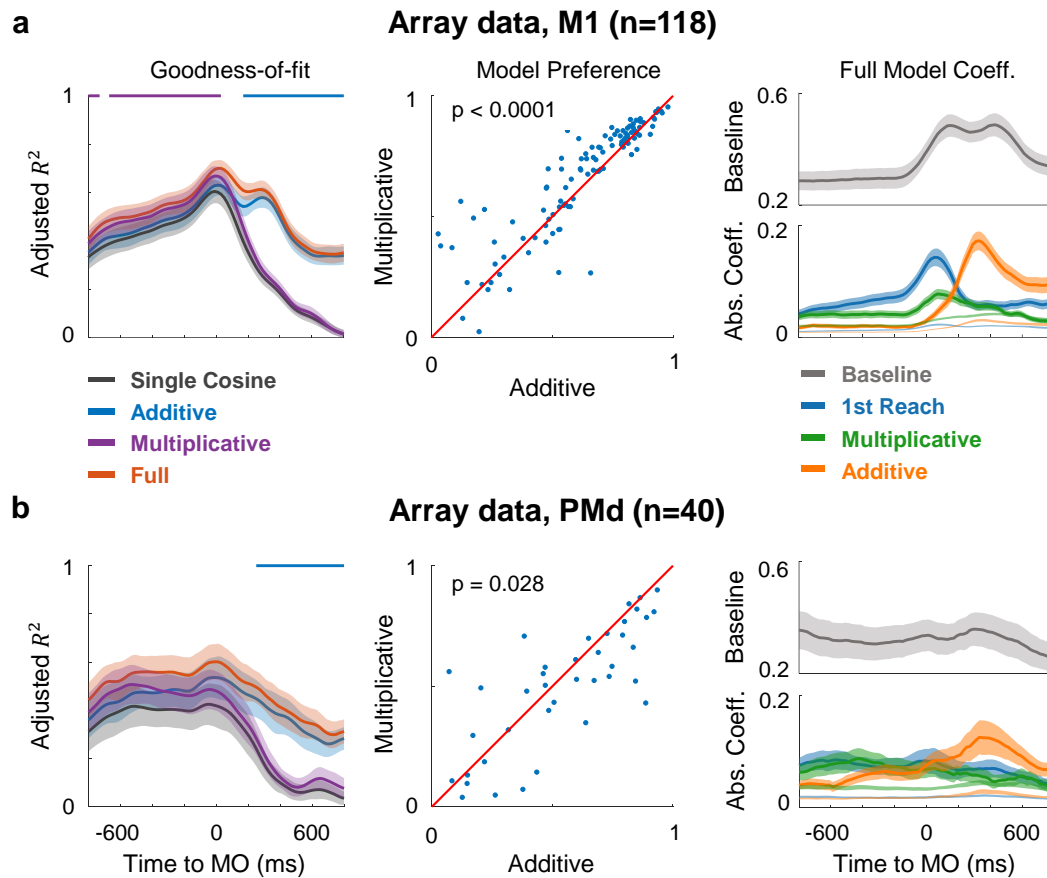

262

263

**Figure 5 Dynamics of goodness-of-fit and coefficient**

264 **a.** Results of regression on M1 neurons in array dataset from monkey C are illustrated at the population level. Left:  
 265 Goodness-of-fit was evaluated with averaged adjusted  $R^2$  for all fitting models in a 200-ms sliding window (with  
 266 twice standard error in shade). The upper line showed the significance ( $p < 0.0005$ ) of comparison between  
 267 performance of multiplicative (purple line) and additive (blue line) model. Middle: Scatters compared the goodness-  
 268 of-fit at MO (-100~100 ms to MO) between the multiplicative and additive models, each dot represents the result of  
 269 a neuron. Right: Absolute value of each coefficient is averaged across neurons (with twice standard error in shade),  
 270 the temporal dynamics of which shows the contribution of terms. The coefficient weight of permutation test was  
 271 plotted in light shade as the chance level. **b.** Similar with A, results of regression on PMd neurons in array.

272

273

274

275

276

277

278

To scrutinize the changing encoding pattern, we plotted the averaged absolute coefficients of the full model across time (Fig. 5, right panel). For M1 neurons, the weights of the 1st reach and the multiplicative term ramped up over the chance level (given by a permutation test, see Methods) during preparation, whereas the additive weight remained at the chance level in preparation and mainly increased after MO. This contemporaneous activation of coefficients was similar to the situation in prefrontal cortex where neurons were modulated by both direction and sequence<sup>32-34</sup>. Similar dynamics were found in all monkeys (Fig. S3), suggesting a common transition from a gain-

279 modulation interplay during motor preparation to a concurrent coding during motor execution. This  
280 concurrence has been reported by the previous study<sup>27</sup>. For PMd neurons, the overall encoding  
281 process was essentially consistent with that in M1: the 1st movement → the multiplicative term →  
282 the additive term. However, in PMd, these three components made comparable contributions in the  
283 preparation period, and there was no obvious peak of the 1st reach and multiplicative coefficients.  
284 The onset times for the increase of the additive coefficient, and the decrease of the 1st reach and  
285 multiplicative coefficients, were much earlier in PMd than in M1, implying that PMd takes  
286 precedent in coding of the 2nd reach.

287 So far, we have analyzed the linear and nonlinear components comprised in neural encoding for  
288 double-reach and their interchangeable predominance. The multiplicative joint coding, revealed by  
289 the multiplicative model and validated by the multiplicative weight in the full model, now becomes a  
290 key concern because it would be apparently a unique signature of continuous motor sequences.

291

## 292 **Multiplicative coding embodied in initial states**

293 According to our regression analyses, the multiplication of the tunings corresponding to the 1st  
294 and 2nd reaches could be intrinsic in sequence-related preparatory activity. From the dynamical  
295 systems perspective, preparatory activity would be set to a subspace optimal as initial states to  
296 trigger motor generation<sup>35</sup>. We expected a spatially inclusive distribution of initial states to accord  
297 with mathematical multiplication.

298 To verify this hypothesis, we performed a supervised dimensionality reduction procedure. Firstly,  
299 principal component analysis (PCA) was applied to the preparatory neural activity during a period of  
300 600 ms before GO. Next, the Fisher's linear discriminant analysis (LDA) was utilized to find the  
301 optimal discriminant projection in accordance with tagged conditions<sup>36</sup>. In this PCA-LDA analysis,  
302 selected principal components from PCA (the number was chosen by cross-validation) were applied  
303 to LDA. We first analyzed neural activity in SR trials and built an SR subspace. Neural states  
304 clustered by conditions, as visualized in the 2-d projections found by LDA (Fig. 6a). Then, we  
305 projected both DR and SR data onto the resulted space and found that neural states of both DR and  
306 SR trials clustered according to their 1st or only reach direction. This suggests that despite the  
307 proposed sequence modulation in preparatory activity for single neurons, the neural population  
308 preserved a linear representation for the preceding movement. However, the variance explained were  
309 higher for SR than DR (For monkey C array, variance explained of SR is 10.9%, DR is 7.8%. For  
310 monkey B, variance explained of SR is 9.0%, DR is 6.6%. For monkey C single electrode, variance  
311 explained of SR is 6.2%, DR is 5.6%. For monkey G, variance explained of SR is 31.6%, DR is  
312 27.5%). To neutralize the tuning for the immediate movement, we used DR trials with the same 1st  
313 reach direction alone for the PCA-LDA analysis. Therefore, relatively low-dimensional neural states  
314 grouped by the 1st reach directions, could be projected again onto dimensions maximizing the  
315 difference brought by the 2nd reach directions. The result of trials where the 1st reach direction was  
316 towards the lower-right was visualized, with trials classified into six clusters corresponding to their  
317 subsequent reach directions (Fig. 6c; subsequent reach directions are indicated by markers; ten-fold  
318 cross-validation accuracy was higher than 0.6, above the chance level for the classification of six  
319 conditions, 1/6, excluding LDA overfitting). There were great differences between SR (circles) and

320 DR (other markers) clusters, indicating that the initial states for sequential movements were  
321 distinctive. Interestingly, in some conditions, DR trials obviously clustered in order from CW 60° to  
322 CCW 60°, and the CW and CCW states were located on both sides of the 180° states. This structural  
323 spatial distribution of LDA states supported by Mahalanobis distances (Fig. S5) may signify a  
324 condensation of subsequent movement information in the strong representation of occurrent  
325 movement. In addition, the results for other monkeys for the DR task showed a similar tendency  
326 (Fig. S6-S8).

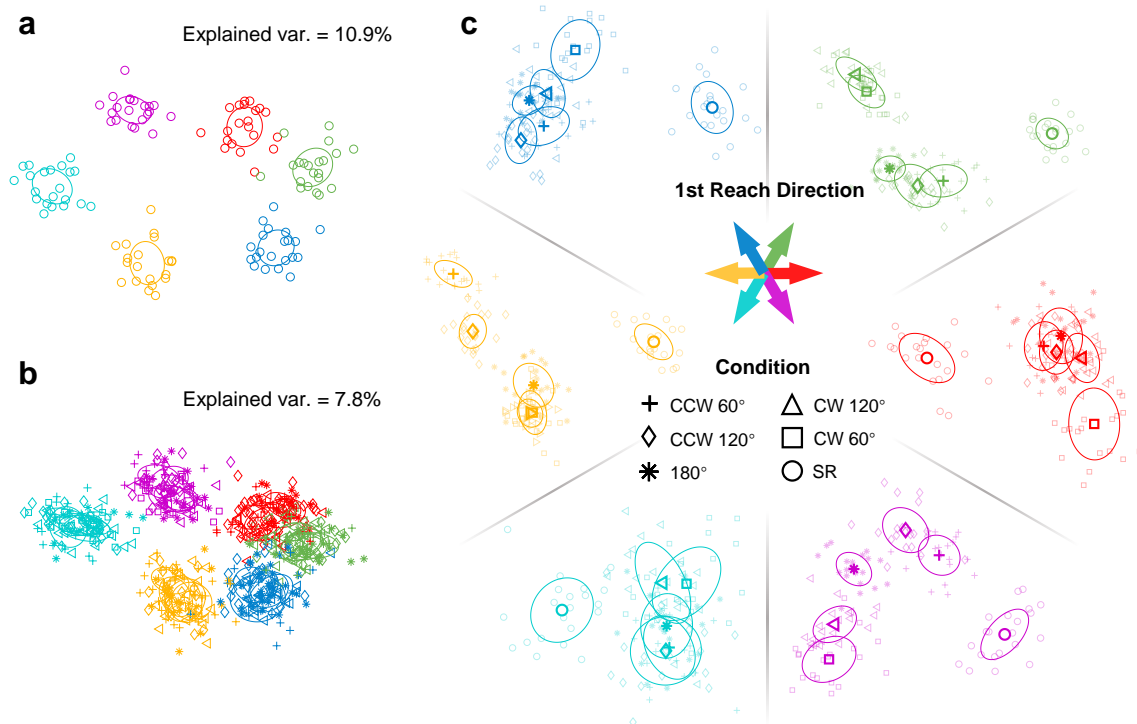

327 **Figure 6 Projection of preparatory activity onto PCA-LDA resulting initial state space.**  
328 **a.** Projection on SR space. Neural states of SR trials were clearly clustered according to their reaching directions. **b.**  
329 Neural states of DR trials also clustered into six groups according to their 1st reach direction when projected onto  
330 the SR space. Variance explained by the two dimensions were calculated. **c.** LDA classified neural states of trials  
331 with the same 1st reach direction into clusters grouped by 2nd reach directions, forming an initial state space for the  
332 subsequent movement. Colors indicate the 1st movement directions; DR trials are presented in the same color family  
333 of related SR trials. Markers indicate 2nd reaching direction. The ellipses show the covariance projection of related  
334 conditions.  
335

### 336 **Multiplicative coding preserves linear readout of immediate reach**

337 As several investigators have pointed out<sup>12, 21, 37, 38</sup>, as well as PCA results suggested, the  
338 neural population preserves a reliable readout of ongoing movement direction, despite the  
339 sequence-related differences at the single-neuron level. Since nonlinear mixed selectivity is  
340 believed to form high-dimensional neural representations that guarantee the linear readout of  
341 particular parameters<sup>39</sup>, we speculate that each linear readout in sequential movements benefits  
342 from multiplicative joint coding.

343 We checked the linear readout of immediate movement direction as population vectors (PV) in  
344 data. The PV pointed to the immediate reach direction before MO in DR trials as expected (Fig. S9).  
345 To figure out the impact of the multiplicative or additive joint coding on PV, we adopted a proved  
346 simulation method<sup>40</sup> to obtain surrogate data corresponding to the cosine, additive, and  
347 multiplicative models (see Methods). Each dataset consisted of 200 model neurons with activity in  
348 an epoch of 600 ms from preparatory activity until the 1st reach end. Those additive and  
349 multiplicative neurons were regulated by a fixed 2nd reach direction as well. We present the  
350 responses of three example model neurons with the same  $\theta_{PD}$  in Fig. 7a. Obviously, the direction  
351 inducing the highest firing rate changed in additive and multiplicative neurons, compared to the  
352 ‘single cosine’ neurons, resulting in a modulated tuning curve (Fig. 7b). We used the original  $\theta_{PD}$   
353 for the calculation of PV. Interestingly, PVs in the multiplicative DR dataset correctly and stably  
354 pointed to the immediate reach direction as in the SR condition, whereas PVs in the additive DR  
355 dataset deviated from the desired direction (Fig. 7c). These simulations show that multiplicative joint  
356 coding can preserve a robust linear readout of immediate reach direction, even containing  
357 subsequent reach directions.

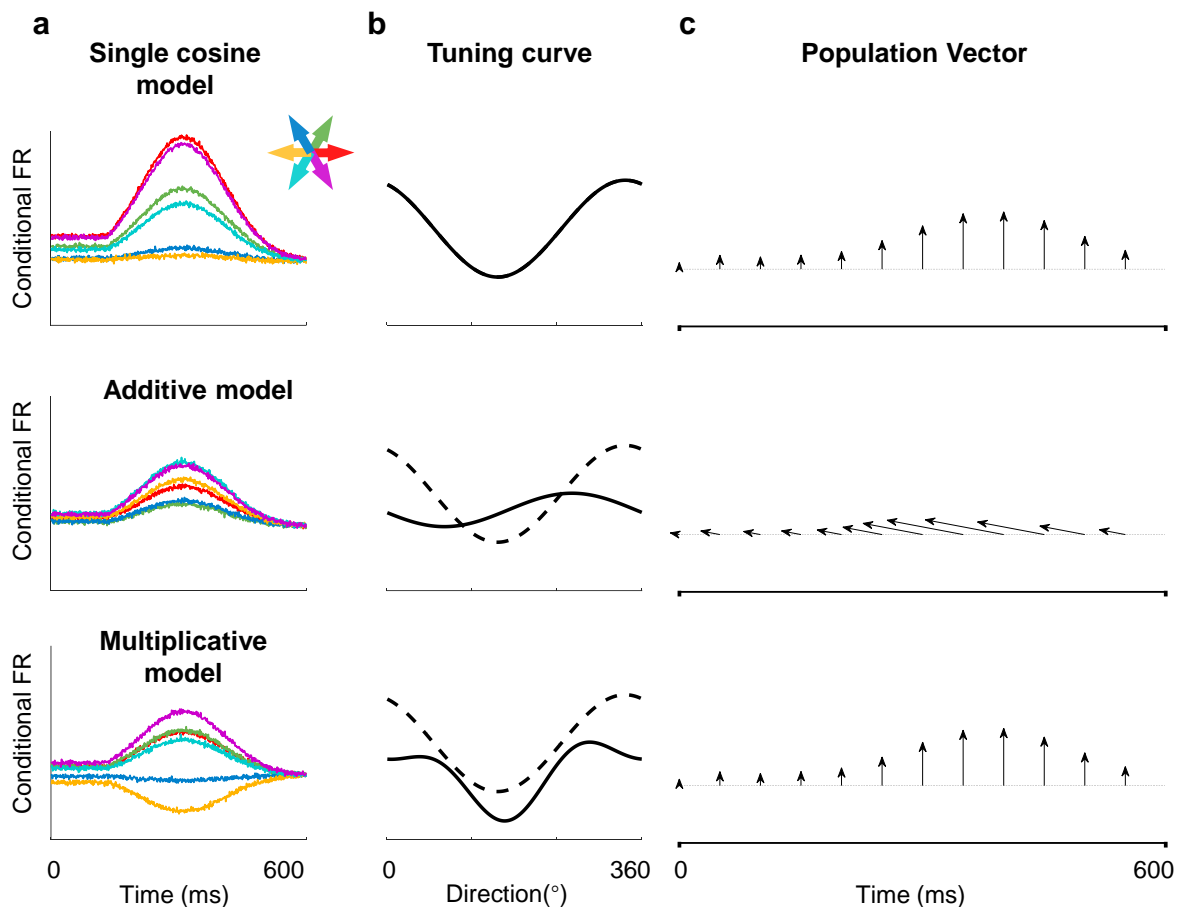

358  
359 **Figure 7 Simulation of neural tunings on population vector during single and double reach.**  
360 **a.** Example neurons of three simulated datasets. Averaged firing rates of different conditions (1st reach directions)  
361 are shown in corresponding colors. These three example model neurons were simulated according to the single  
362 cosine, the additive, and the multiplicative models with the same preferred direction  $\theta_{PD}$ . **b.** Directional tuning  
363 curves with (solid line) and without (dash line) modulation. **c.** Population vectors of three simulated datasets.  
364 Population vectors were calculated every 50 ms. The correct reaching direction is upward. The population vector of

365 multiplicative dataset pointed in the same direction as PV of single cosine dataset, while the PVs of additive dataset  
366 shift away from the desired reaching direction.

367

368 **Multiplicative joint coding emerged in recurrent neural network (RNN) generating motor**  
369 **sequence**

370 Due to their flexibility and time-varying characteristics, RNNs are increasingly welcomed as  
371 models matching a dynamical system<sup>41-43</sup>. To find out whether a dynamical system can also  
372 capture the subtle joint-coding rule found in the motor cortex, we trained an RNN model to  
373 perform the double-reach task.

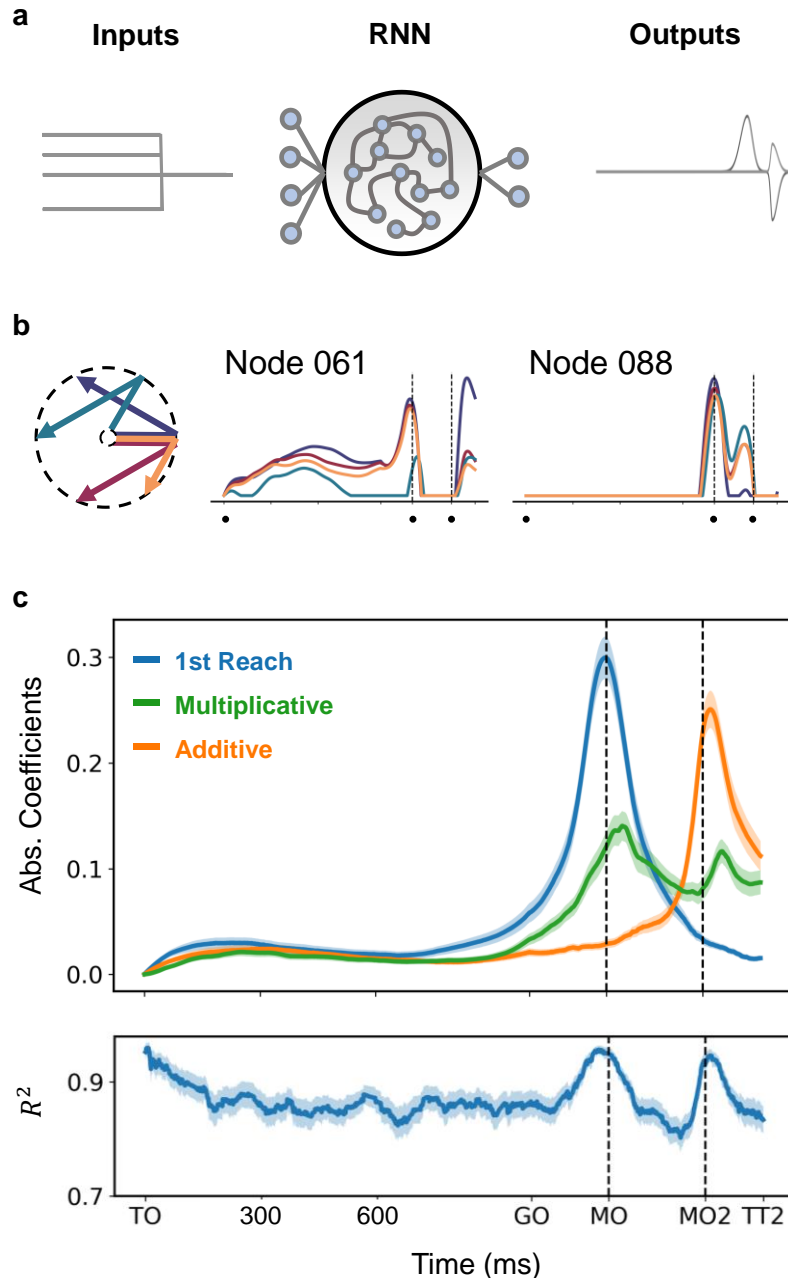

374  
375  
376  
377  
378  
379  
380  
381  
382  
383  
384  
385  
386

**Figure 8 Results of an RNN model.**

**a.** Schematic of the RNN model. The RNN model consisted of an input layer, a hidden layer, and an output layer. The input layer received signal for position of two targets simultaneously, while the output layer produced population vector (PV), whose magnitude reflects the degree of movement tendency for neural population in the corresponding direction. **b.** Response of two example nodes under four conditions. The selected conditions are represented in different colors as shown in left. The black dots denote target on (TO), the 1st movement onset (MO), and the 2nd movement onset (MO2), respectively. Most model nodes show temporally similar responses to real neurons. **c.** Full model fitting result for RNN nodes. It turned out that the temporal dynamics of the terms in this RNN model are comparable to those in real neurons. The  $R^2$  was calculated across nodes. The error bar in this panel was plotted according to twice standard error. Time markers are ticked as: target on (TO), go-cue on (GO), the 1st movement onset (MO), and the 2nd movement onset (MO2).



387 The three-layer RNN received the movement direction of two reaches as input (Fig. 8a). The  
388 input signals were presented simultaneously, though instructing sequential actions. In contrast to  
389 previous work in which RNNs were instructed to generate velocity<sup>40</sup> or EMG<sup>44</sup>, our model was  
390 required to produce PV. This design was preferred for these reasons: first, the variables related to  
391 actual movement, like velocity and EMG, have to lag behind the neural activity due to  
392 transmission delay from cortex to muscle. In contrast, PV could be real-time, and thus reflect  
393 more temporal features; also, this design is consistent with our hypothesis that multiplicative  
394 joint coding benefit linear readout of movements (Fig. 7).

395 The trained RNN performed well (for training set  $R^2=0.9711\pm 0.0044$ , for validation  
396  $R^2=0.8976\pm 0.1070$ , mean $\pm$ SD; see Methods). Model nodes exhibited comparable temporal  
397 dynamics with real neurons recorded in the present study. Here we exhibit two example nodes  
398 under four specific conditions (Fig. 8b). For the node 088, the two bumps of its response indicate  
399 that it is closely related to the ongoing movement, which is typical for neurons in M1. The  
400 response of the node 061 seems more complex, as the augment around MO does not occur in all  
401 conditions. Interestingly, this node appears to have ‘direction selectivity’, the only exceptive  
402 movement direction for the 1st reach (in cyan) induces obviously distinguished response.  
403 Moreover, its responses under different conditions retain distinct during preparatory period.

404 Observing richer preparatory dynamics than expected, we wondered whether the temporal  
405 dynamics of components corresponding to different movement courses were consistent between  
406 model and neural data. Therefore, we tested the ‘full model’ fitting on nodes of our model. As  
407 shown in Fig. 8c, the profile of regression coefficients of model nodes largely resembles that of  
408 real data (Fig. 5a, right, Fréchet distance = 0.47, see Methods). The weight of the 1st reach peaks  
409 at MO and decays afterwards. The weight of the additive term, which relates to the 2nd reach,  
410 reaches its apex around MO2 with a slightly smaller magnitude. During the preparation, the  
411 weight of the multiplicative term fluctuates, but maintains a considerable influence. This  
412 suggests that the proposed multiplicative joint coding for sequential movement, here a double  
413 reach, also emerges in a dynamical system.

414  
415

## 416 Discussion

417 In order to understand how the motor cortex generates motor programs for consecutive arm  
418 movement sequences, we recorded neuronal activity when monkeys performed double-reach  
419 directed at simultaneously cued memorized targets. We found that pre-movement activity carries  
420 sequence information in a heterogeneous manner. Regression analysis shows that neuronal tuning to  
421 1st and 2nd reaches can be well explained by multiplicative and additive models in the preparatory  
422 and execution periods, respectively. Dimensionality reduction analysis demonstrates that neural  
423 states during preparation sub-clustered according to the 2nd reach within the optimal subspaces of  
424 the 1st reach. Simulation via model neurons points out the merit of multiplicative joint coding in  
425 maintaining robust linear readout for the ongoing movement direction. An RNN model trained for  
426 double-reach task can simulate the real encoding properties, which are marked by conspicuous  
427 nonlinearity. Taken together, these results suggest that primate motor cortex is profoundly involved  
428 in forming plans for multi-step movements. In addition, the transition between the newfound  
429 multiplicative joint coding and overlapped independent coding hints at a shifting neural encoding  
430 mechanism for motor sequences.

431 Previous studies have revealed that motor cortex not only carries information regarding upcoming  
432 movements, but also reflects sensory and cognitive factors during both preparation and execution  
433 periods<sup>6, 9, 12, 16, 17</sup>. Nevertheless, how this ‘sequence selective’ response reflects motor sequence has  
434 not yet been answered. A recent work following the dynamical systems perspective found that ‘the  
435 preparatory subspace was occupied twice, once before each reach’ thus suggested that each of  
436 movement elements were encoded independently in the motor cortex rather than holistically.  
437 However, if individual movements were independently planned, the reaching error should  
438 accumulate, which has not yet been observed<sup>45</sup>. Furthermore, it was demonstrated that the holistic  
439 planning might enhance motor learning, but such effect would not occur when different follow-  
440 throughs were rehearsed individually<sup>46</sup>. This finding strongly suggests that sequential planning is  
441 associated with special neural states in preparation, in accordance with our findings. Also, unlike in  
442 the parietal cortex, neuronal activity in the motor cortex exhibits strong heterogeneity<sup>47</sup>, which often  
443 comes from mixed selectivity of behavioral parameters and tuning dynamics<sup>30, 48-50</sup>. Given these  
444 considerations and our results, we propose that elements in a consecutive movement sequence  
445 should be interactively planned in a spatio-temporally coordinated manner beforehand.

446 As one of the cortical regions carrying much information regarding movement timing<sup>10</sup> and  
447 kinematics<sup>11</sup>, motor cortex presumably participates in encompassing and coordinating sequence  
448 components. In the present study, both reaching targets were turned off 400-800 ms before GO,  
449 encouraging the monkeys to plan the whole reaching sequence in the preparatory period. Our results  
450 revealed that neurons tended to jointly encode double-reach in a nonlinear multiplicative manner  
451 during preparation. The multiplicative model’s performance degraded after MO, perhaps because  
452 joint coding mainly exists during preparation, but lies in the null-space during execution. Also, as a  
453 reaching sequence is decomposed into motor elements, the lack of an additive term makes it  
454 incapable of capturing the parallel components after MO<sup>27</sup>. The concept of the multiplicative model  
455 originated from gain modulation<sup>51, 52</sup>, and a work regarding the question of whether the neural  
456 response was constructed with nonlinear interactions between parameters, rather than their linear  
457 combination<sup>30</sup>. In the case of sequential movements, this issue becomes whether sequential  
458 elements are planned conjunctively or independently. As the primary nonlinear interaction,

459 multiplication is a common form of gain modulation that has been widely found in mixed selectivity  
460 <sup>51, 52</sup>. This coding manner can provide new dimensions for motor preparation and learning <sup>53</sup>, and  
461 according to our simulation, it can also consolidate the linear readout for impending movements.  
462 Because such mixed selectivity of parameters enlarges the neural space encoded by a certain number  
463 of neurons <sup>36, 39, 53</sup>, the dimensionalities induced by multiplicative coding may perform as the null  
464 space of impending movement.

465 Although our analyses of joint coding are based on directional tuning, we did not mean to  
466 imply that the motor cortex exclusively encodes movement direction. Rather, we treated the  
467 directional tuning as a marker of interaction, rooted in the heterogeneous neuronal response.  
468 Since the motor cortex is recognized to play a straightforward role in generating descending  
469 command for muscle activity production <sup>54, 55</sup>, future studies should also take into account  
470 muscle activity to explain how joint coding benefits the generation of compound double reaches  
471 from a dynamical systems perspective <sup>44</sup>. However, it is a limitation of the present study that  
472 sEMG data were not sufficient to explore this issue.

473 Regarding joint coding embodied in motor cortex as a key signature to encompass movement  
474 elements in the planning of consecutive sequences, we are not claiming that it seeds a neural  
475 dynamical system that can autonomously generate the entire motor sequence. Instead, sequential  
476 behavior emerges from a large brain network, including parietal-frontal circuits <sup>9, 56</sup> and subcortical  
477 areas like the thalamus and basal ganglia <sup>57</sup>. Remarkably, our results of PMd, which are so different  
478 from those of M1, have already indicated diverse functions and coding characteristics of different  
479 cortical regions. Now that the dynamical evolution in the motor cortex necessarily relies on external  
480 inputs from other brain areas <sup>58</sup>, an intriguing question is how intrinsic dynamics and external inputs  
481 interplay to generate a motor sequence, including the role of the proposed joint coding in the motor  
482 cortex. To go further, collective studies across multiple brain regions and experimental interventions  
483 are needed.

484

485

486

487 **Acknowledgments**

488 We thank Y. Guo, J. Malpeli, Q. Wang, C. Zheng, and R. Zheng for helpful comments and  
489 discussions; C. Guan and L. Wang for veterinary assistance; P. Ding for administrative support.

490

491 **Author Contributions**

492 T. Wang, Y. Zhang, and H. Cui designed the experiment, T. Wang and Y. Zhang collected the  
493 data, T. Wang analyzed the data, Y. Chen built computational model, T. Wang, Y. Chen, and H.  
494 Cui prepared the manuscript.

495

496 **Funding**

497 This work was supported by National Key R&D Program (2017YFA0701102,  
498 2020YFB1313400), National Science Foundation of China (31871047 and 31671075), Shanghai  
499 Municipal Science and Technology (18JC1415100 and 2021SHZDZX), and Strategic Priority  
500 Research Program of Chinese Academy of Science (Grant No. XDB32040100).

501

502 The authors declare no conflict of interests.

503

504

## 505 **Methods**

506

### 507 **Experimental preparation.**

508 Three male rhesus macaques (monkey B, C, and G, *Macaca mulatta*, 5-9 kg) were trained to  
509 perform a cohesive double reach (Fig. 1a). In each session, the monkey sat in a custom-designed  
510 primate chair. Stimuli were backprojected onto a vertical touch screen (Elo Touchsystems, 19”;  
511 sampling at 100 Hz, spatial resolution <0.1 mm) ~30 cm in front of the monkey. In the recording  
512 sessions using microelectrode arrays (Utah array, Blackrock), hand position was monitored optically  
513 via reflective markers attached to the wrist (Vicon Inc.), besides, acceleration and surface  
514 electromyography (sEMG) were recorded via a wireless sensor (Delsys Trigno Lab) attached to the  
515 targeted muscles. All procedures were in accordance with NIH guidelines and were approved by the  
516 Institutional Animal Care and Use Committee (IACUC) of Institute of Neuroscience, CAS.

517

### 518 **Behavioral task.**

519 In addition to the standard version of the paradigm described in Results (Fig. 1a), to further  
520 examine the interaction between movement elements, we trained monkey C to perform an extended  
521 version of the task with multi-direction, in which the angle between the square and triangle could be  
522 60° or 120° in both CW and CCW directions as well as 180°. This multi-direction task has 36  
523 conditions in total (six SR and 30 DR).

524

### 525 **Data collection and analysis.**

526 For single-electrode recording, monkeys B and C were implanted with a standard recording  
527 cylinder (diameter = 19 mm) located over M1 and caudal PMd in the left hemisphere, guided by pre-  
528 scanned MRI and stereotactic coordinates. Recording sites are shown in Fig. S1. Recordings were  
529 made using glass-coated tungsten electrodes (AlphaOmega, ~1.5 MΩ impedance at 1 kHz). Activity  
530 was recorded online by an AlphaOmega Lab SNR system, sampled at 44 kHz. After recordings, raw  
531 data were sorted offline according to an online template by Spike2 (Spike2 7.15, CED). For multi-  
532 electrode recording, monkey G and C, respectively, were implanted with a 96-channel and two 128-  
533 channel Utah microelectrode arrays (Blackrock Microsystems, Salt Lake City, UT) in the motor  
534 cortex of the right hemisphere (Fig. S1). Recording sites were located using MRI and cortex surface  
535 features. Array recorded raw data were sorted offline by Wave\_clus<sup>59</sup>. All monkeys were restricted  
536 to using the hand contralateral to the recorded hemisphere when performing the task. Data from  
537 monkey C were first obtained with a single microelectrode, and subsequently from an array in the  
538 other hemisphere with a switch of hands.

539 In total, we collected 279 and 117 well-isolated units from monkey B and C through single-  
540 electrode recording, respectively. Among these, 224 units from monkey B and 98 from monkey C

541 with significant directional preference (One-way ANOVA,  $p < 0.05$ ) in single reach were chosen for  
542 further analysis. For multi-electrode recording, we collected 252 and 63 well-isolated units from  
543 monkey C and G, respectively. Among these, 158 units from monkey C and 44 from monkey G with  
544 significant directional preference (One-way ANOVA,  $p < 0.05$ ) were used. The selected neurons  
545 formed a 3-dimensional *NKT* ( $N$ : neuron number,  $K$ : trial number, and  $T$ : spike time) dataset for  
546 regression and state-space analysis.

547

### 548 **Peri-stimulus time histograms (PSTHs).**

549 For each unit, we calculated its PSTHs with time aligned to event markers such as the GO signal,  
550 the 1st/only movement onset (MO), the 1st/only movement end (ME), and the 2nd movement onset  
551 (MO2). We defined MO as the moment when the monkey's hand left the touch screen and ME as the  
552 time when monkey's hand touched the target on the screen. All firing rates were smoothed with a  
553 Gaussian kernel ( $SD = 20$  ms). The mean standard error (mean SE) of firing rate was estimated from  
554 10 bootstrap samples.

555

### 556 **Regression**

557 We adopted the directional tuning model<sup>1, 30</sup> to fit neural responses in the double-reach task. We  
558 fitted the normalized condition-averaged firing rates in a 200-ms sliding window with 20-ms step  
559 (using Matlab function 'fit' and 'fitnlm'). First, we fitted the double-reach data as follow:

$$560 \quad FR = a \cos(\theta - \theta_{PD}) + c \quad (1)$$

561 where  $\theta$  is the movement direction,  $\theta_{PD}$  is the PD,  $a$  and  $c$  denote regression coefficients. Both the  
562 1st and the 2nd reach direction were used for regression to see which direction is better represented  
563 at that time bin (Fig. S2). Then we regressed double-reach data with the following models:

564 Additive model:

$$565 \quad FR = a_1 \cos(\theta_1 - \theta_{PD}) + a_2 \cos(\theta_{21} - \theta_{PD}) + c \quad (2)$$

566 Multiplicative model:

$$567 \quad FR = a_1 \cos(\theta_1 - \theta_{PD}) + b \cos(\theta_{21} - \theta_{PD}) \cos(\theta_1 - \theta_{PD}) + c \quad (3)$$

568 Full model:

$$569 \quad FR = a_1 \cos(\theta_1 - \theta_{PD}) + a_2 \cos(\theta_{21} - \theta_{PD}) + b \cos(\theta_{21} - \theta_{PD}) \cos(\theta_1 - \theta_{PD}) + c \quad (5)$$

570 where  $a_1, a_2, b, c$  are regression coefficients,  $\theta_1$  is the 1st movement direction,  $\theta_{21}$  is 2nd movement  
571 direction from the 1st reach endpoint,  $\theta_{PD}$  is preferred direction.

572 Note that both the additive and multiplicative model have four coefficients while full model has  
573 five. To compensate for this difference, we use the adjusted  $R^2$  rather than actual  $R^2$ .

574 
$$R_{adj}^2 = 1 - \left( \frac{n-1}{n-p} \right) \frac{SSE}{SST}$$

575 where SSE is the sum of squared error, SST is the sum of squared total,  $n$  is the number of  
576 observations, and  $p$  is the number of regression coefficients. Because actual  $R^2$  likely increases with  
577 added predictor variables in the regression model, the adjusted  $R^2$  adjusts for the number of  
578 predictor variables in the model. This makes it more useful for comparing models with a different  
579 number of predictors.

580 We also compared the goodness-of-fit between the multiplicative and additive models using the  
581 Wilcoxon signed rank test. We plot a line (purple for the multiplicative model, blue for the additive  
582 model) when one is significantly ( $p < 0.0005$ ) better than the other.

583 In addition, we calculated the effect size  $r = Z/\sqrt{n}$  using function “wilcoxonPairedR” in package  
584 “rcompanion” of R (Mangiafico, S.S. 2016. Summary and Analysis of Extension Program  
585 Evaluation in R, version 1.19.10. [rcompanion.org/handbook/](http://rcompanion.org/handbook/)). The  $r$  value could be interpreted as  
586 small effect in 0.1-0.4, medium effect in 0.4-0.6, and large effect  $\geq 0.6$ .

587 To get the chance levels of each coefficient and to reflect the effect of modulation, we performed  
588 a permutation test with 1000 repetitions separately for the coefficient of the 1st reach, multiplicative  
589 term, and additive term in reference of Sober and Sabes<sup>60</sup>.

590

### 591 **PCA-LDA analysis for neural states.**

592 *NKT* datasets were used in this analysis. Neuronal firing rates were calculated with a 300-ms bin  
593 width ( $T = 2$ ) and normalized by Z-score (MATLAB function ‘*zscore*’) to avoid bias from high  
594 firing rate neurons. *NKT* data were reshaped into  $K \times NT$ , where  $K$  is trial number,  $N$  is neuron  
595 number, and  $T$  is bin number. After pre-processing, we ran PCA to reduce these dimensions to  
596  $K \times P$ . The number of PCs,  $P$ , was chosen by 10-fold cross-validation to avoid overfitting. This step  
597 also helped avoid singular matrices for LDA and reduced data noise<sup>36</sup>. Then we ran LDA to project  
598 the  $P$ -dimensional matrix onto a  $C$ -dimensional space, where  $C$  is the number of trial conditions.  
599 LDA can find axes that best separate the categories. After this, we applied QR decomposition to get  
600 the orthonormal basis for the neural state space<sup>61</sup>. Each trial was finally described by  $C - 1$   
601 components derived from selected neural activity. We chose the first two components covering the  
602 largest variance to plot the 2-D projection of trial data and the ellipse of covariance; each data point  
603 represented the neural state in a trial.

604

605

## 606 Simulation of population vector in sequential reach

607 We adopted the simulation method of <sup>40</sup> to generate surrogate data based on single cosine,  
608 additive, and multiplicative models. Preparatory and peri-movement activity were simulated with  
609 200 neurons in six directions. The averaged neuronal firing rate  $f_{n,c}$  for neuron  $n$ , in condition  $c$ , at  
610 time  $t$  is given by,

$$611 f_{n,c}(t, \tau_n, \sigma) = \begin{cases} b_{n,c} e^{-\frac{(t-\tau_n-\mu_0)^2}{2\sigma^2}} + \varepsilon, & t \geq \tau_n \\ \varphi b_{n,c} + \varepsilon, & t < \tau_n \end{cases}$$

612 where  $\sigma$  is the duration parameter,  $\tau_n$  is the response latency of each neuron (normally distributed),  
613  $\varphi$  is the preparatory activity amplitude constant fixed at 0.2,  $\mu_0$  is constant given by  $\mu_0 =$   
614  $\sigma\sqrt{-2\ln\varphi}$ , and  $\varepsilon$  is random noise (SD=0.01).  $b_{n,c}$  is the gain for neuronal condition preference. For  
615 data of the cosine model, which is expected to mimic neuronal activity in SR trials,  $b_{n,c}$  is simply  
616 tuned to reach directions as

$$617 b_{n,c} = \frac{1 + \cos(\theta_1 - \theta_{PD})}{2}.$$

618 The additive surrogate data were based on the parallel coding hypothesis that sequential movements  
619 are planned independently with the overlap in the peri-movement period;  $b_{n,c}$  is given by

$$620 b_{n,c} = \frac{1 + \cos(\theta_1 - \theta_{PD}) + \cos(\theta_{21} - \theta_{PD})}{3}.$$

621 The multiplicative surrogate data were based on the gain-modulation hypothesis, the interaction of  
622 both movement directions in sequential reach contributed to the neuronal response,

$$623 b_{n,c} = \frac{1 + \cos(\theta_1 - \theta_{PD}) + \cos(\theta_1 - \theta_{PD}) \cos(\theta_{21} - \theta_{PD})}{3},$$

624 For the above definitions,  $\theta_1$  is the 1st movement direction,  $\theta_{21}$  is the 2nd movement direction  
625 relative to the 1st movement endpoint, and  $\theta_{PD}$  is the preferred direction.

626

## 627 Model training

628 Our RNN model was designed to simulate the situation where double reach was accomplished  
629 by a pure dynamical system. The input was movement direction for two sequential reaches, in  
630 form of 2-D coordinates  $[\cos(\theta_1), \sin(\theta_1); \cos(\theta_2), \sin(\theta_2)]$ , where  $\theta_1$  and  $\theta_2$  represent the 1st  
631 and relative 2nd movement directions, respectively. Because the model was built to generate  
632 population vectors (PVs), we constructed ‘desired PVs’ instead of using real data for generality.  
633 The output was read out as  $[r \cos(\theta), r \sin(\theta)]$ , where  $\theta$  is the present movement direction, and  
634  $r$  reflects the intensity of integrated response for population. We used Gaussian functions to



635 emulate the time-varying magnitude. To ensure the trend at critical time markers was similar to  
636 the actual situation, we separated the two-peak PV profile into four sections: from GO to MO,  
637 from MO to the 1st touch, from the 1st touch to MO2, and from MO2 to the 2nd touch, and  
638 spliced them together after respective optimization and normalization. We used 18 standard  
639 conditions in training, including SR conditions and DR conditions as mentioned previously. For  
640 validation, we tested 30 conditions, in which the angles between the 1st and 2nd targets were 60°  
641 and 120° in both CW and CCW directions, as well as 180°.

642 The nodes in the RNN model were evolved according to a standard continuous dynamical  
643 equation<sup>40</sup>:

$$644 \quad \tau \dot{x}_i(t) = -x_i + \sum_{k=1}^N J_{ik} r_k(t) + \sum_{k=1}^I B_{ik} u_k(t)$$

645 where  $\tau$  is a time constant,  $N$  is the number of network nodes, and  $I$  is the number of the inputs.  
646 The activity of nodes is represented by  $x$ , whose firing rates are determined by

$$647 \quad r = \begin{cases} 0, & x < 0 \\ \tanh(x), & x \geq 0 \end{cases}.$$

648 The output was read out linearly as:

$$649 \quad z_i = \sum_{k=1}^N W_{ik} r_k(t)$$

650 where  $z$  represents the two PV readouts ( $i = 1, 2$ ). In this model, the connection weight among  
651 nodes is denoted by matrix  $J$ , the connectivity between hidden nodes and input  $u(t)$  is defined by  
652 matrix  $B$ , and the weight matrix between hidden nodes and output is  $W$ .

653 The size of our RNN was fixed at 200. We initialized both connection matrix  $B$  and  $J$  to be  
654 normally distributed (for  $B$ :  $mean = 0, SD = 1/\sqrt{N}$ ; for  $J$ :  $mean = 0, SD = g/\sqrt{N}$ ;  $g = 1.5$ ),  
655 matrix  $W$  to be all zero, and chose a time constant  $\tau = 50 \text{ ms}$  in the light of previous work<sup>40, 62</sup>.

656 All three weights were adjustable and optimized during training. We used the summation of the  
657 error function and three regularity terms as a cost function<sup>44</sup>. The error function was the squared  
658 error between the model output and the desired PV. The three regularity terms penalized the  
659 magnitude of the averaged firing rate, the intensity of the input and output weights, and the  
660 complexity of state trajectories; the hyper-parameters for these three terms in our model were 1e-2,  
661 1, and 1e-2, respectively. The training was finished with PyTorch, and the weights were optimized  
662 by Adam (Adaptive Moment Estimation).

663 To compare the pattern of coefficients, we visualized the three time-varying coefficients as a  
664 normalized 3D trajectory, and calculated the Fréchet distance between trajectories of different  
665 sessions or monkeys. The distance between monkey C's array and the RNN was 0.47; in contrast,

666 that between monkey C's array and single electrode recordings was 0.39, between monkey C's array  
667 and monkey B was 0.56, between monkey C array and monkey G was 0.23. The average distance  
668 between monkey C's array and the permutation was 1.08.  
669

670 **References**

- 671
- 672 1. Georgopoulos, A.P., Kalaska, J.F., Caminiti, R. & Massey, J.T. On the relations between  
673 the direction of two-dimensional arm movements and cell discharge in primate motor cortex. *J*  
674 *Neurosci* **2**, 1527-1537 (1982).
- 675 2. Schwartz, A.B. Motor cortical activity during drawing movements: single-unit activity  
676 during sinusoid tracing. *J Neurophysiol* **68**, 528-541 (1992).
- 677 3. Fu, Q.G., Suarez, J.I. & Ebner, T.J. Neuronal Specification of Direction and Distance  
678 during Reaching Movements in the Superior Precentral Premotor Area and Primary Motor  
679 Cortex of Monkeys. *Journal of Neurophysiology* **70**, 2097-2116 (1993).
- 680 4. Moran, D.W. & Schwartz, A.B. Motor cortical representation of speed and direction  
681 during reaching. *J Neurophysiol* **82**, 2676-2692 (1999).
- 682 5. Paninski, L., Fellows, M.R., Hatsopoulos, N.G. & Donoghue, J.P. Spatiotemporal tuning  
683 of motor cortical neurons for hand position and velocity. *J Neurophysiol* **91**, 515-532 (2004).
- 684 6. Hatsopoulos, N.G. & Suminski, A.J. Sensing with the motor cortex. *Neuron* **72**, 477-487  
685 (2011).
- 686 7. Omrani, M., Kaufman, M.T., Hatsopoulos, N.G. & Cheney, P.D. Perspectives on  
687 classical controversies about the motor cortex. *J Neurophysiol* **118**, 1828-1848 (2017).
- 688 8. Lashley, K.S. The Problem of Serial Order in Behavior. in *Cerebral mechanisms in*  
689 *behavior; the Hixon Symposium* (ed. L.A. Jeffress) 112–146 (Wiley, 1951).
- 690 9. Tanji, J. Sequential organization of multiple movements: involvement of cortical motor  
691 areas. *Annu Rev Neurosci* **24**, 631-651 (2001).
- 692 10. Kaufman, M.T., Churchland, M.M., Ryu, S.I. & Shenoy, K.V. Cortical activity in the null  
693 space: permitting preparation without movement. *Nat Neurosci* **17**, 440-448 (2014).
- 694 11. Ashe, J. & Georgopoulos, A.P. Movement parameters and neural activity in motor cortex  
695 and area 5. *Cereb Cortex* **4**, 590-600 (1994).
- 696 12. Lu, X. & Ashe, J. Anticipatory activity in primary motor cortex codes memorized  
697 movement sequences. *Neuron* **45**, 967-973 (2005).
- 698 13. Kettner, R.E., Marcario, J.K. & Port, N.L. Control of remembered reaching sequences in  
699 monkey. II. Storage and preparation before movement in motor and premotor cortex. *Exp Brain*  
700 *Res* **112**, 347-358 (1996).
- 701 14. Kettner, R.E., Marcario, J.K. & Clark-Phelps, M.C. Control of remembered reaching  
702 sequences in monkey. I. Activity during movement in motor and premotor cortex. *Exp Brain Res*  
703 **112**, 335-346 (1996).
- 704 15. Shanechi, M.M., *et al.* Neural population partitioning and a concurrent brain-machine  
705 interface for sequential motor function. *Nat Neurosci* **15**, 1715-1722 (2012).

- 706 16. Carpenter, A.F., Baud-Bovy, G., Georgopoulos, A.P. & Pellizzer, G. Encoding of Serial  
707 Order in Working Memory: Neuronal Activity in Motor, Premotor, and Prefrontal Cortex during a  
708 Memory Scanning Task. *J Neurosci* **38**, 4912-4933 (2018).
- 709 17. Carpenter, A.F., Georgopoulos, A.P. & Pellizzer, G. Motor cortical encoding of serial  
710 order in a context-recall task. *Science* **283**, 1752-1757 (1999).
- 711 18. Mushiake, H., Inase, M. & Tanji, J. Neuronal activity in the primate premotor,  
712 supplementary, and precentral motor cortex during visually guided and internally determined  
713 sequential movements. *J Neurophysiol* **66**, 705-718 (1991).
- 714 19. Baldauf, D., Cui, H. & Andersen, R.A.J.J.o.N. The Posterior Parietal Cortex Encodes in  
715 Parallel Both Goals for Double-Reach Sequences. **28**, 10081-10089 (2008).
- 716 20. Batista, A.P. & Andersen, R.A. The parietal reach region codes the next planned  
717 movement in a sequential reach task. *J Neurophysiol* **85**, 539-544 (2001).
- 718 21. Ben-Shaul, Y., *et al.* Neuronal activity in motor cortical areas reflects the sequential  
719 context of movement. *J Neurophysiol* **91**, 1748-1762 (2004).
- 720 22. Matsuzaka, Y., Picard, N. & Strick, P.L. Skill representation in the primary motor cortex  
721 after long-term practice. *J Neurophysiol* **97**, 1819-1832 (2007).
- 722 23. Wu, S.W., Dal Martello, M.F. & Maloney, L.T. Sub-optimal allocation of time in sequential  
723 movements. *PLoS One* **4**, e8228 (2009).
- 724 24. Zhang, H., Wu, S.W. & Maloney, L.T. Planning multiple movements within a fixed time  
725 limit: The cost of constrained time allocation in a visuo-motor task. *J Vision* **10** (2010).
- 726 25. Wolpert, D.M. & Landy, M.S. Motor control is decision-making. *Curr Opin Neurobiol* **22**,  
727 996-1003 (2012).
- 728 26. Kornysheva, K., *et al.* Neural Competitive Queuing of Ordinal Structure Underlies Skilled  
729 Sequential Action. *Neuron* **101**, 1166-1180.e1163 (2019).
- 730 27. Zimnik, A.J. & Churchland, M.M. Independent generation of sequence elements by  
731 motor cortex. *Nat Neurosci* **24**, 412-424 (2021).
- 732 28. Ames, K.C., Ryu, S.I. & Shenoy, K.V. Simultaneous motor preparation and execution in  
733 a last-moment reach correction task. *Nat Commun* **10**, 2718 (2019).
- 734 29. Baldauf, D., Cui, H. & Andersen, R.A. The posterior parietal cortex encodes in parallel  
735 both goals for double-reach sequences. *J Neurosci* **28**, 10081-10089 (2008).
- 736 30. Inoue, Y., Mao, H., Suway, S.B., Orellana, J. & Schwartz, A.B. Decoding arm speed  
737 during reaching. *Nat Commun* **9**, 5243 (2018).
- 738 31. Ifft, P.J., Lebedev, M.A. & Nicolelis, M.A. Cortical correlates of fitts' law. *Front Integr*  
739 *Neurosci* **5**, 85 (2011).

- 740 32. Averbeck, B.B., Chafee, M.V., Crowe, D.A. & Georgopoulos, A.P. Parallel processing of  
741 serial movements in prefrontal cortex. *Proceedings of the National Academy of Sciences of the*  
742 *United States of America* **99**, 13172-13177 (2002).
- 743 33. Averbeck, B.B., Chafee, M.V., Crowe, D.A. & Georgopoulos, A.P. Neural activity in  
744 prefrontal cortex during copying geometrical shapes. I. Single cells encode shape, sequence,  
745 and metric parameters. *Experimental brain research* **150**, 127-141 (2003).
- 746 34. Averbeck, B.B., Crowe, D.A., Chafee, M.V. & Georgopoulos, A.P. Neural activity in  
747 prefrontal cortex during copying geometrical shapes. II. Decoding shape segments from neural  
748 ensembles. *Experimental brain research* **150**, 142-153 (2003).
- 749 35. Vyas, S., Golub, M.D., Sussillo, D. & Shenoy, K.V. Computation Through Neural  
750 Population Dynamics. *Annu Rev Neurosci* **43**, 249-275 (2020).
- 751 36. Parthasarathy, A., *et al.* Mixed selectivity morphs population codes in prefrontal cortex.  
752 *Nat Neurosci* **20**, 1770-1779 (2017).
- 753 37. Lu, X. & Ashe, J. Dynamic reorganization of neural activity in motor cortex during new  
754 sequence production. *Eur J Neurosci* **42**, 2172-2178 (2015).
- 755 38. Yokoi, A. & Diedrichsen, J. Neural Organization of Hierarchical Motor Sequence  
756 Representations in the Human Neocortex. *Neuron* **103**, 1178-1190 e1177 (2019).
- 757 39. Rigotti, M., *et al.* The importance of mixed selectivity in complex cognitive tasks. *Nature*  
758 **497**, 585-590 (2013).
- 759 40. Michaels, J.A., Dann, B. & Scherberger, H. Neural Population Dynamics during  
760 Reaching Are Better Explained by a Dynamical System than Representational Tuning. *PLoS*  
761 *Comput Biol* **12**, e1005175 (2016).
- 762 41. Russo, A.A., *et al.* Neural Trajectories in the Supplementary Motor Area and Motor  
763 Cortex Exhibit Distinct Geometries, Compatible with Different Classes of Computation. *Neuron*  
764 (2020).
- 765 42. Laje, R. & Buonomano, D.V. Robust timing and motor patterns by taming chaos in  
766 recurrent neural networks. *Nat Neurosci* **16**, 925-933 (2013).
- 767 43. Bondanelli, G. & Ostojic, S. Coding with transient trajectories in recurrent neural  
768 networks. *PLoS Comput Biol* **16**, e1007655 (2020).
- 769 44. Sussillo, D., Churchland, M.M., Kaufman, M.T. & Shenoy, K.V. A neural network that  
770 finds a naturalistic solution for the production of muscle activity. *Nat Neurosci* **18**, 1025-1033  
771 (2015).
- 772 45. Li, Y. & Cui, H. Dorsal parietal area 5 encodes immediate reach in sequential arm  
773 movements. *J Neurosci* **33**, 14455-14465 (2013).
- 774 46. Sheahan, H.R., Franklin, D.W. & Wolpert, D.M. Motor Planning, Not Execution,  
775 Separates Motor Memories. *Neuron* **92**, 773-779 (2016).

- 776 47. Churchland, M.M. & Shenoy, K.V. Temporal complexity and heterogeneity of single-  
777 neuron activity in premotor and motor cortex. *J Neurophysiol* **97**, 4235-4257 (2007).
- 778 48. Taylor, D.M., Tillery, S.I. & Schwartz, A.B. Direct cortical control of 3D neuroprosthetic  
779 devices. *Science* **296**, 1829-1832 (2002).
- 780 49. Chase, S.M., Kass, R.E. & Schwartz, A.B.J.J.o.N. Behavioral and neural correlates of  
781 visuomotor adaptation observed through a brain-computer interface in primary motor cortex.  
782 **108**, 624-644 (2012).
- 783 50. Suway, S.B., *et al.* Temporally Segmented Directionality in the Motor Cortex. *Cereb*  
784 *Cortex* **28**, 2326-2339 (2018).
- 785 51. Andersen, R.A., Essick, G.K. & Siegel, R.M. Encoding of spatial location by posterior  
786 parietal neurons. *Science* **230**, 456-458 (1985).
- 787 52. Zipser, D. & Andersen, R.A. A back-propagation programmed network that simulates  
788 response properties of a subset of posterior parietal neurons. *Nature* **331**, 679-684 (1988).
- 789 53. Fusi, S., Miller, E.K. & Rigotti, M. Why neurons mix: high dimensionality for higher  
790 cognition. *Curr Opin Neurobiol* **37**, 66-74 (2016).
- 791 54. Morrow, M.M. & Miller, L.E. Prediction of muscle activity by populations of sequentially  
792 recorded primary motor cortex neurons. *J Neurophysiol* **89**, 2279-2288 (2003).
- 793 55. Todorov, E. Direct cortical control of muscle activation in voluntary arm movements: a  
794 model. *Nat Neurosci* **3**, 391-398 (2000).
- 795 56. Andersen, R.A. & Cui, H. Intention, action planning, and decision making in parietal-  
796 frontal circuits. *Neuron* **63**, 568-583 (2009).
- 797 57. Jin, X. & Costa, R.M. Shaping action sequences in basal ganglia circuits. *Curr Opin*  
798 *Neurobiol* **33**, 188-196 (2015).
- 799 58. Sauerbrei, B.A., *et al.* Cortical pattern generation during dexterous movement is input-  
800 driven. *Nature* **577**, 386-391 (2020).
- 801 59. Chaure, F.J., Rey, H.G. & Quian Quiroga, R. A novel and fully automatic spike-sorting  
802 implementation with variable number of features. *J Neurophysiol* **120**, 1859-1871 (2018).
- 803 60. Sober, S.J. & Sabes, P.N. Flexible strategies for sensory integration during motor  
804 planning. *Nat Neurosci* **8**, 490-497 (2005).
- 805 61. Cowley, B.R., *et al.* DataHigh: graphical user interface for visualizing and interacting with  
806 high-dimensional neural activity. *Journal of neural engineering* **10**, 066012 (2013).
- 807 62. Sussillo, D. & Abbott, L.F. Generating coherent patterns of activity from chaotic neural  
808 networks. *Neuron* **63**, 544-557 (2009).
- 809  
810
